# Supplementary material for: Diagnosis and management of polycystic ovary syndrome in the UK (2004–2014): a retrospective cohort study
Source: PubMed Central journal article supplement (PMC4947736; doi:10.1136/bmjopen-2016-012461), 2016-07-11
Supplement: bmjopen-2016-012461supp.pdf [file bmjopen-2016-012461supp.pdf]

## Data supplement

**Table SI Code lists used to identify study variables**

| <b>medcode</b>                             | <b>description</b>                 |
|--------------------------------------------|------------------------------------|
| <b>Codes for polycystic ovary syndrome</b> |                                    |
| C164.12                                    | Stein - Leventhal syndrome         |
| C165.00                                    | Polycystic ovarian syndrome        |
| 7E25300                                    | Endoscopic drilling of ovary       |
| K591100                                    | Oligomenorrhoea                    |
| K591200                                    | Primary oligomenorrhoea            |
| K591300                                    | Secondary oligomenorrhoea          |
| K594.00                                    | Irregular menstrual cycle          |
| K594z00                                    | Irregular menstrual cycle NOS      |
| C161000                                    | Hypersecretion of ovarian androgen |
| M240.00                                    | Alopecia                           |
| M240000                                    | Alopecia unspecified               |
| M240200                                    | Male pattern alopecia              |
| M240300                                    | Frontal alopecia of women          |
| M240400                                    | Premature alopecia                 |
| M240z00                                    | Alopecia NOS                       |
| M241.00                                    | Hirsutism - hypertrichosis         |
| M260.00                                    | Acne varioliformis                 |
| M260000                                    | Acne frontalis                     |
| M260z00                                    | Acne varioliformis NOS             |
| M261.00                                    | Other acne                         |
| M261000                                    | Acne vulgaris                      |
| M261100                                    | Acne conglobata                    |
| M261600                                    | Cystic acne                        |
| M261A00                                    | Pustular acne                      |
| M261E00                                    | Acne excoriee des jeunes filles    |
| M261F00                                    | Acne fulminans                     |
| M261G00                                    | Acne agminata                      |
| M261J00                                    | Acne necrotica                     |
| M261K00                                    | Acne keloidalis                    |
| M261X00                                    | Acne, unspecified                  |
| M261z00                                    | Other acne NOS                     |
| Myu6300                                    | [X]Other androgenic alopecia       |
| Myu6800                                    | [X]Other acne                      |
| Myu6F00                                    | [X]Acne, unspecified               |
| 4473                                       | Serum testosterone                 |
| 4473100                                    | Serum testosterone level abnormal  |
| 4474                                       | Free androgen index                |
| 4474100                                    | Free androgenic index abnormal     |
| 447G.00                                    | Plasma testosterone level          |
| 447H.00                                    | Androgen level                     |
| 4Q26.00                                    | Dihydrotestosterone level          |

|                                         |                                                        |
|-----------------------------------------|--------------------------------------------------------|
| 4Q2E.00                                 | Free testosterone level                                |
| 4Q2F.00                                 | Calculated free testosterone                           |
| ZRBs.00                                 | Ferriman and Galwey score                              |
| K53..11                                 | Ovarian cysts                                          |
| K532.00                                 | Other ovarian cysts                                    |
| K532z00                                 | Ovarian cyst NOS                                       |
| Kyu9500                                 | [X]Other and unspecified ovarian cysts                 |
| <b>Codes for diseases for exclusion</b> |                                                        |
| B540.00                                 | Malignant neoplasm of adrenal gland                    |
| B540000                                 | Malignant neoplasm of adrenal cortex                   |
| B540100                                 | Malignant neoplasm of adrenal medulla                  |
| B540z00                                 | Malignant neoplasm of adrenal gland NOS                |
| B587.00                                 | Secondary malignant neoplasm of adrenal gland          |
| B7H0.00                                 | Benign neoplasm of adrenal gland                       |
| B8yy100                                 | Carcinoma in situ of adrenal gland                     |
| B922.00                                 | Neoplasm of uncertain behaviour of adrenal gland       |
| BB5h.00                                 | [M]Adrenal cortical tumours                            |
| BB5h000                                 | [M]Adrenal cortical adenoma NOS                        |
| BB5h100                                 | [M]Adrenal cortical carcinoma                          |
| BB5h300                                 | [M]Adrenal cortical adenoma, heavily pigmented variant |
| BB5h400                                 | [M]Adrenal cortical adenoma, clear cell type           |
| BB5h500                                 | [M]Adrenal cortical adenoma, glomerulosa cell type     |
| BB5h600                                 | [M]Adrenal cortical adenoma, mixed cell type           |
| BB5hz00                                 | [M]Adrenal cortical tumours NOS                        |
| BBCF.00                                 | [M]Adrenal rest tumour                                 |
| BBD7.00                                 | [M]Extra-adrenal paraganglioma, NOS                    |
| C15..00                                 | Disorders of adrenal glands                            |
| C153.00                                 | Other corticoadrenal overactivity                      |
| C155000                                 | Adrenal medullary insufficiency                        |
| C15y.00                                 | Other specified adrenal disorders                      |
| C15yz00                                 | Other specified adrenal disorder NOS                   |
| C15z.00                                 | Adrenal gland disorder NOS                             |
| Cyu4A00                                 | [X]Other specified disorders of adrenal gland          |
| PK1..00                                 | Anomalies of adrenal gland                             |
| PK10.00                                 | Aberrant adrenal gland                                 |
| PK12.00                                 | Accessory adrenal gland                                |
| PK13.00                                 | Hypoplasia of adrenal gland                            |
| PK14.00                                 | Ectopic adrenal gland                                  |
| PK1y.00                                 | Other specified anomalies of adrenal gland             |
| PK1y000                                 | Congenital cyst of adrenal gland                       |
| PK1yz00                                 | Other congenital anomaly of adrenal gland NOS          |
| PK1z.00                                 | Anomalies of adrenal gland NOS                         |
| 2226.11                                 | O/E - cushingoid facies                                |
| C150.00                                 | Cushing's syndrome                                     |
| C150000                                 | Idiopathic Cushing's syndrome                          |
| C150100                                 | Iatrogenic Cushing's syndrome                          |
| C150111                                 | Drug-induced Cushing's syndrome                        |

|         |                                                              |
|---------|--------------------------------------------------------------|
| C150200 | Pituitary dependent Cushing's syndrome                       |
| C150300 | Ectopic ACTH secretion causing Cushing's syndrome            |
| C150500 | Alcohol-induced pseudo-Cushing's syndrome                    |
| C150z00 | Cushing's syndrome NOS                                       |
| Cyu4500 | [X]Other Cushing's syndrome                                  |
| F395100 | Myopathy due to Cushing's syndrome                           |
| C150400 | Nelson's syndrome                                            |
| BB5y400 | [M]Prolactinoma                                              |
| B542.00 | Malignant neoplasm pituitary gland and craniopharyngeal duct |
| B542000 | Malignant neoplasm of pituitary gland                        |
| B542z00 | Malig neop pituitary gland or craniopharyngeal duct NOS      |
| B7H2.00 | Benign neoplasm of pituitary gland and craniopharyngeal duct |
| B7H2.11 | Pituitary adenoma                                            |
| B7H2000 | Benign neoplasm of pituitary gland                           |
| B7H2z00 | Benign neoplasm of pituitary and craniopharyngeal duct NOS   |
| B8yy300 | Carcinoma in situ of pituitary gland                         |
| B920.00 | Neop uncertain behaviour pituitary and craniopharyngeal duct |
| B920000 | Neoplasm of uncertain behaviour of pituitary gland           |
| B920z00 | Neop uncertain behaviour pituitary and craniopharyngeal NOS  |
| BB5V.00 | [M]Pituitary adenomas and carcinomas                         |
| BB5Vz00 | [M]Pituitary adenoma or carcinoma NOS                        |
| C13.00  | Disorders of pituitary gland and its hypothalamic control    |
| C131.00 | Other anterior pituitary hyperfunction                       |
| C134.00 | Other anterior pituitary disorder                            |
| C134z00 | Other anterior pituitary disorder NOS                        |
| C134z11 | Anterior pituitary hormone deficiency NEC                    |
| C137.00 | Iatrogenic pituitary disorders                               |
| C137z00 | Iatrogenic pituitary disorder NOS                            |
| C13z.00 | Pituitary disorders NOS                                      |
| Cyu4400 | [X]Other disorders of pituitary gland                        |
| Cyu4M00 | [X]Hyperfunction of pituitary gland, unspecified             |
| K5B1.00 | Female infertility of pituitary - hypothalamic origin        |
| K5B1000 | Primary pituitary - hypothalamic infertility                 |
| K5B1z00 | Female infertility of pituitary - hypothalamic cause NOS     |
| PK24.00 | Anomalies of pituitary gland                                 |
| PK24000 | Aberrant pituitary gland                                     |
| PK24z00 | Anomaly of pituitary gland NOS                               |

**Table SII Number and percentage of PCOS women prescribed relevant drugs for PCOS both prior to and following the diagnosis of PCOS stratified by case definition**

| Types of drugs<br>No. (%)                  | Before       |              | After        |             |             |             |             |             |
|--------------------------------------------|--------------|--------------|--------------|-------------|-------------|-------------|-------------|-------------|
|                                            | Diagnosed    | Probable     | 2004-2007    |             | 2008-2011   |             | 2012-2014   |             |
|                                            |              |              | Diagnosed    | Probable    | Diagnosed   | Probable    | Diagnosed   | Probable    |
| <b>Combined oral contraceptives (COC)</b>  | 5136 (31.35) | 7213 (50.37) | 601 (16.68)  | 291 (17.19) | 611 (20.57) | 311 (16.51) | 290 (20.52) | 179 (14.90) |
| <b>Progestin oral contraceptives (POC)</b> | 2067 (12.62) | 3739 (26.11) | 260 (5.48)   | 212 (8.11)  | 377 (9.18)  | 312 (11.58) | 163 (8.29)  | 115 (7.24)  |
| <b>Intrauterine devices (IUDs)</b>         | 191 (1.17)   | 537 (3.75)   | 21 (0.40)    | 23 (0.69)   | 31 (0.64)   | 33 (0.88)   | 13 (0.51)   | 13 (0.54)   |
| <b>Clomiphene</b>                          | 332 (2.03)   | 186 (1.30)   | 164 (3.18)   | 45 (1.34)   | 129 (2.69)  | 38 (0.98)   | 61 (2.41)   | 10 (0.41)   |
| <b>Metformin</b>                           | 1084 (6.62)  | 194 (1.35)   | 1125 (23.27) | 88 (2.62)   | 991 (21.87) | 112 (2.92)  | 459 (19.44) | 51 (2.11)   |
| <b>Gonadotrophins</b>                      | 126 (0.77)   | 309 (2.16)   | 17 (0.32)    | 12 (0.36)   | 7 (0.14)    | 6 (0.16)    | 5 (0.20)    | 8 (0.33)    |
| <b>Spironolactone</b>                      | 174 (1.06)   | 61 (0.43)    | 101 (1.94)   | 9 (0.26)    | 101 (2.08)  | 10 (0.26)   | 37 (1.45)   | 7 (0.28)    |
| <b>Cyproterone</b>                         | 72 (0.44)    | 19 (0.13)    | 27 (0.51)    | 4 (0.12)    | 17 (0.35)   | 2 (0.05)    | 2 (0.08)    | 1 (0.04)    |
| <b>Flutamide</b>                           | 6 (0.04)     | 0            | 4 (0.08)     | 0           | 0           | 1 (0.03)    | 0           | 0           |
| <b>Eflornithine</b>                        | 415 (2.53)   | 135 (0.94)   | 279 (5.33)   | 73 (2.14)   | 292 (6.22)  | 112 (2.93)  | 129 (5.27)  | 47 (1.94)   |
| <b>Weight control/loss drugs</b>           | 849 (5.18)   | 481 (3.36)   | 320 (6.39)   | 84 (2.53)   | 284 (6.22)  | 82 (2.21)   | 72 (3.02)   | 23 (0.98)   |
| <b>Lipid regulators</b>                    | 93 (0.57)    | 101 (0.71)   | 48 (0.91)    | 22 (0.65)   | 25 (0.52)   | 21 (0.55)   | 5 (0.20)    | 3 (0.12)    |
| <b>Acne-related drugs</b>                  | 3547 (21.64) | 5453 (38.08) | 600 (14.99)  | 585 (28.63) | 583 (15.95) | 664 (28.53) | 226 (12.67) | 373 (25.92) |

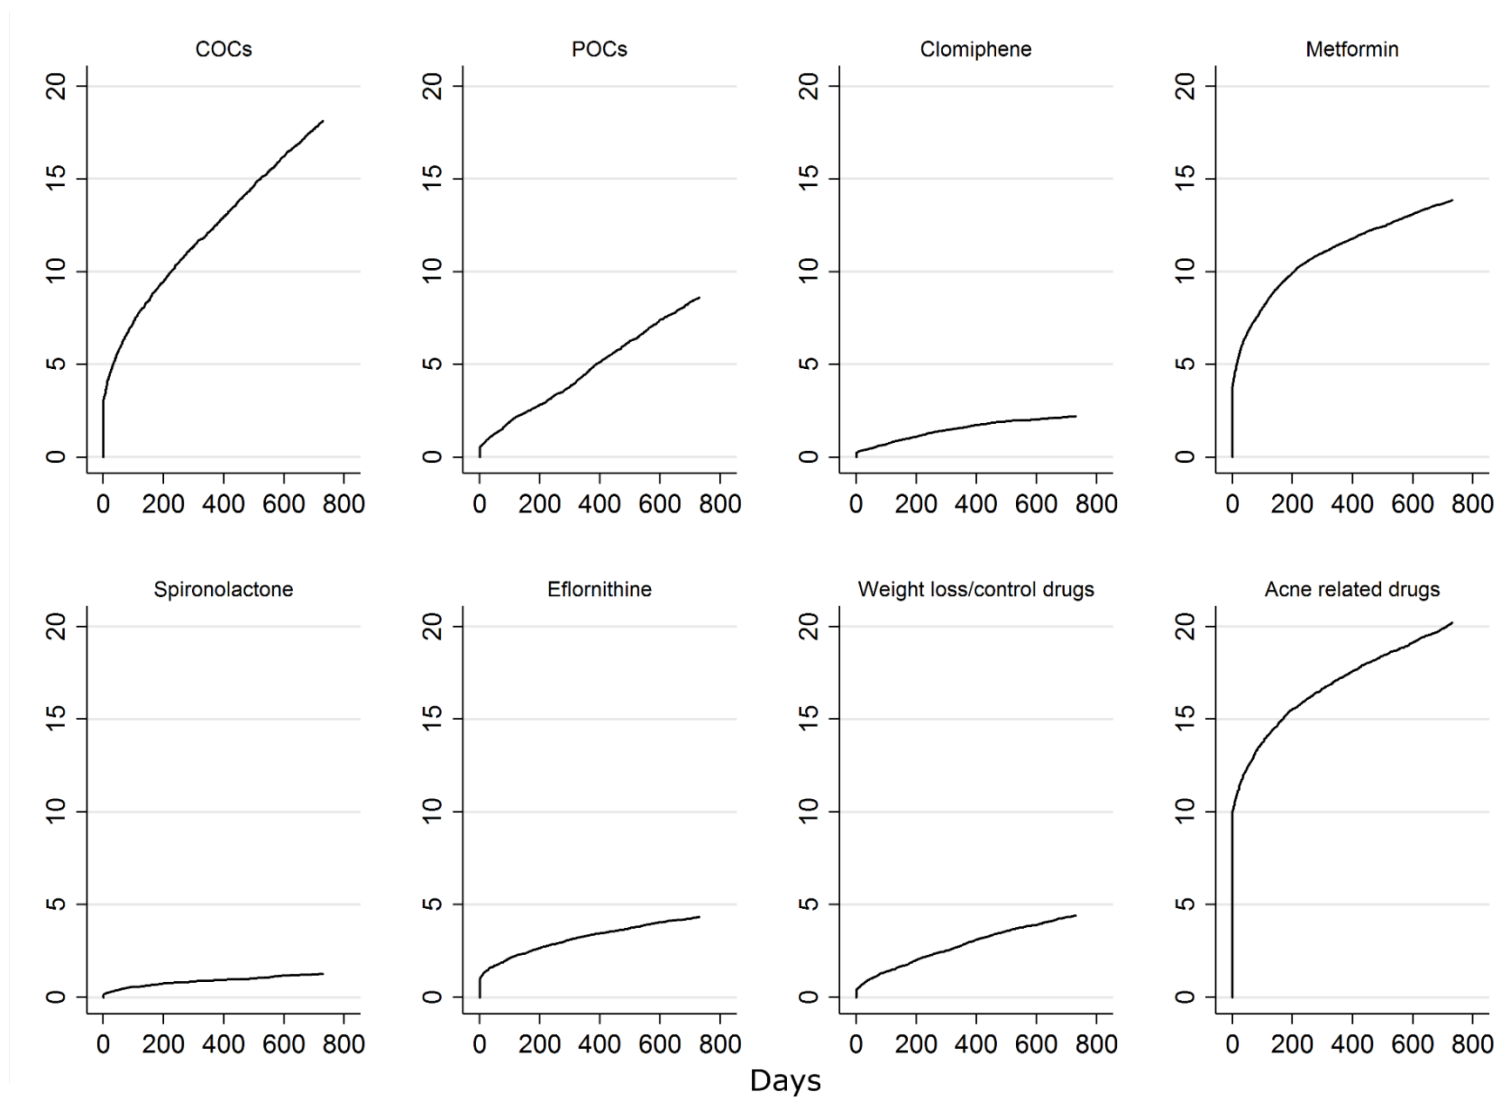

**Figure S1. Plots describing the cumulative incidence of women with a prescription for each drug type over the 730 days following their index date. Results shown for the eight most commonly prescribed drugs.**
